# Supplementary material for: Polymeric Foams as the Matrix of Voltammetric Sensors for the Detection of Catechol, Hydroquinone, and Their Mixtures
Source: Hindawi journal article supplement (doi:10.1155/2018/2714752), 2018-01-01
Supplement: f1 [file 2714752.f1.pdf]

## Polymeric foams as the matrix of voltammetric sensors for the detection of catechol, hydroquinone and their mixtures

C. Fernandez-Blanco<sup>1</sup>, M. Mugica<sup>2</sup>, M.A. Rodriguez-Perez<sup>2</sup>, C. Garcia-Cabezón<sup>1</sup>, M.L. Rodriguez-Mendez<sup>1</sup>

<sup>1</sup>GroupUVaSens. Dpt. Inorganic Chemistry, Engineers School, Universidad de Valladolid, Valladolid (Spain); mluz@eii.uva.es

<sup>2</sup>Cellular Materials Laboratory (CellMat), Condensed Matter Physics Department, University of Valladolid, Campus Miguel Delibes, Paseo de Belén n7, Valladolid, Spain; marrod@fmc.uva.es

\*Correspondence: Prof. María Luz Rodríguez-Méndez, mluz@eii.uva.es;

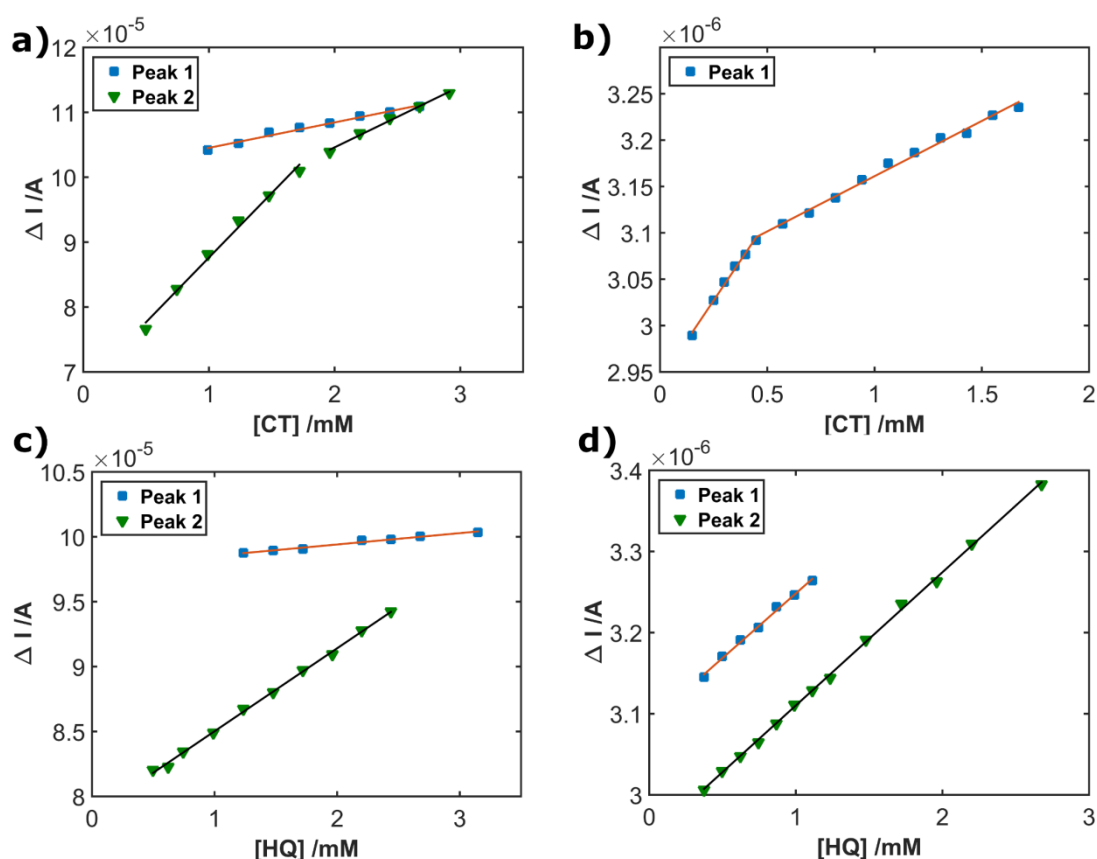

Figure S1. Calibration curves for catechol obtained using (a) PMMA\_G and (b) PMMA\_F\_G, and calibration curves for hydroquinone obtained for (c) PMMA\_G and (d) PMMA\_F\_G.

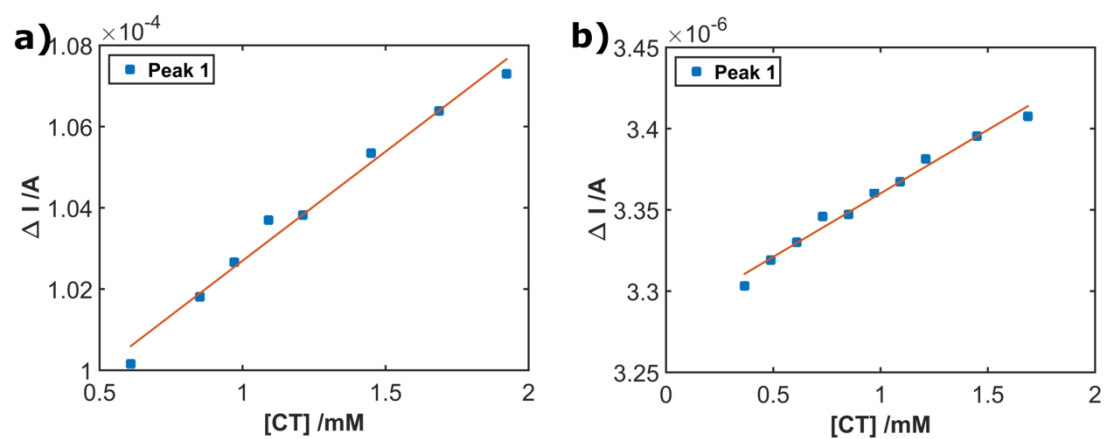

Figure S2. Calibration curves for catechol obtained using (a) PMMA\_G and (b) PMMA\_F\_G in presence of 2 mM of hydroquinone.
